# Supplementary material for: Exploration and detection of nitrosamine impurity nitroso-STG-19 in sitagliptin tablets and API as well as nitrites in excipients by LC-MS/MS methods
Source: Royal Society of Chemistry journal article supplement (doi:10.1039/d4ay00967c), 2024-01-01
Supplement: d4ay00967c1.pdf [file d4ay00967c1.pdf]

## Chromatogram and Results

| Injection Details    |                        |                   |                 |
|----------------------|------------------------|-------------------|-----------------|
| Injection Name:      | NTTP_1ng/ml            | Run Time (min):   | 20.01           |
| Vial Number:         | G:A2                   | Injection Volume: | 5.00            |
| Injection Type:      | Unknown                | Channel           | MS_Quantitation |
| Instrument Method:   | 942AI0073_220902       | Operator          | haoyajie        |
| Processing Method:   | 942AI0073_Quantitative |                   |                 |
| Injection Date/Time: | 22/09/02 17:39:46      |                   |                 |

### Chromatogram

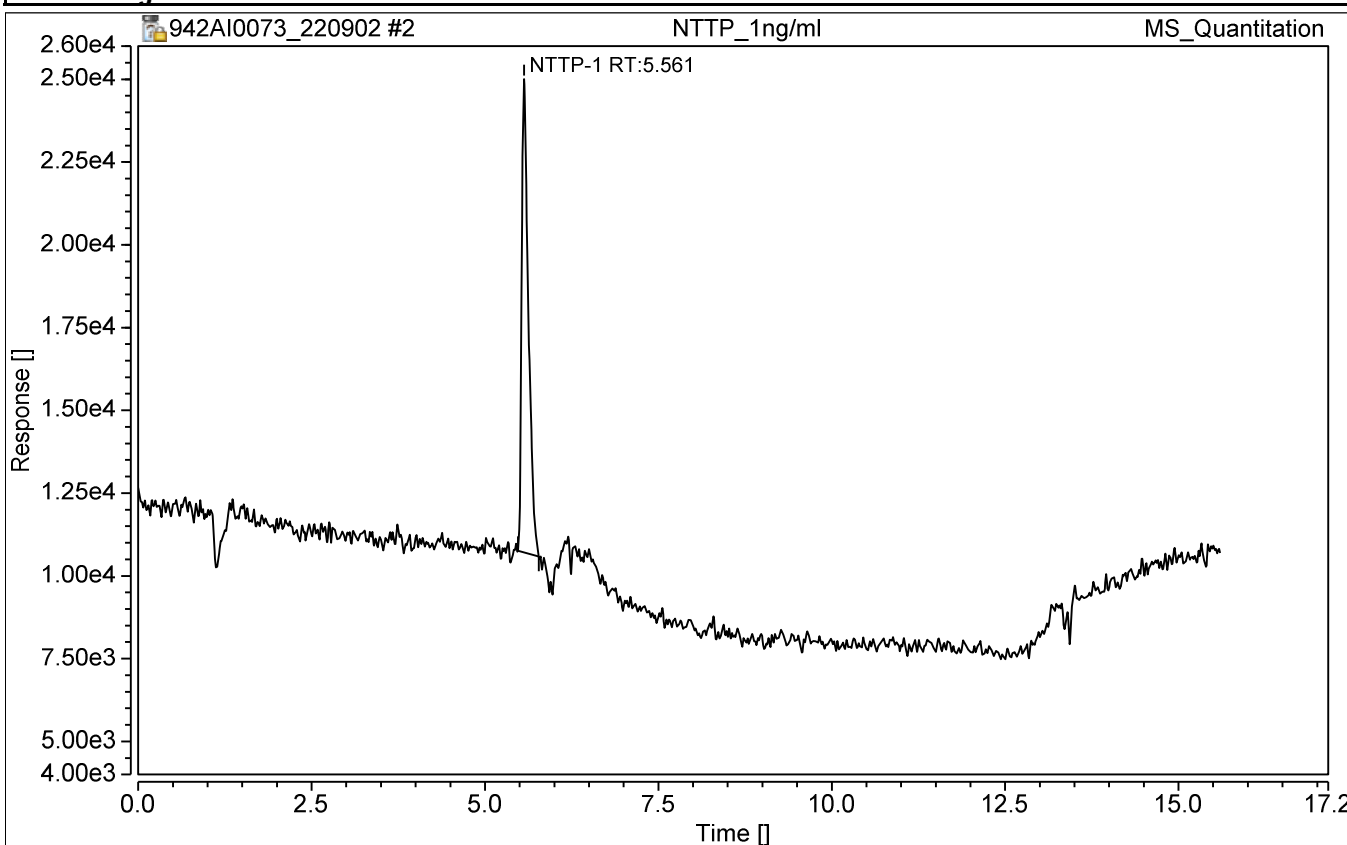

| Integration Results |                    |                  |               |               |        |
|---------------------|--------------------|------------------|---------------|---------------|--------|
| Peak Name           | Retention Time min | Quantitation Ion | Area counts*s | Height counts | Amount |
| NTTP-1              | 5.561              | 192.12           | 96839.4       | 14299.085     | n.a.   |
| NTTP                | n.a.               | 165.05           | n.a.          | n.a.          | n.a.   |

Figure 1. Chromatogram of NTTP (ion 192.125) in method development trial 1

## Chromatogram and Results

### Injection Details

|                      |                        |                   |                 |
|----------------------|------------------------|-------------------|-----------------|
| Injection Name:      | NTTP_1ng/ml            | Run Time (min):   | 20.01           |
| Vial Number:         | G:A2                   | Injection Volume: | 5.00            |
| Injection Type:      | Unknown                | Channel           | MS_Quantitation |
| Instrument Method:   | 942AI0073_220902-1     | Operator          | haoyajie        |
| Processing Method:   | 942AI0073_Quantitative |                   |                 |
| Injection Date/Time: | 22/09/02 18:01:01      |                   |                 |

### Chromatogram

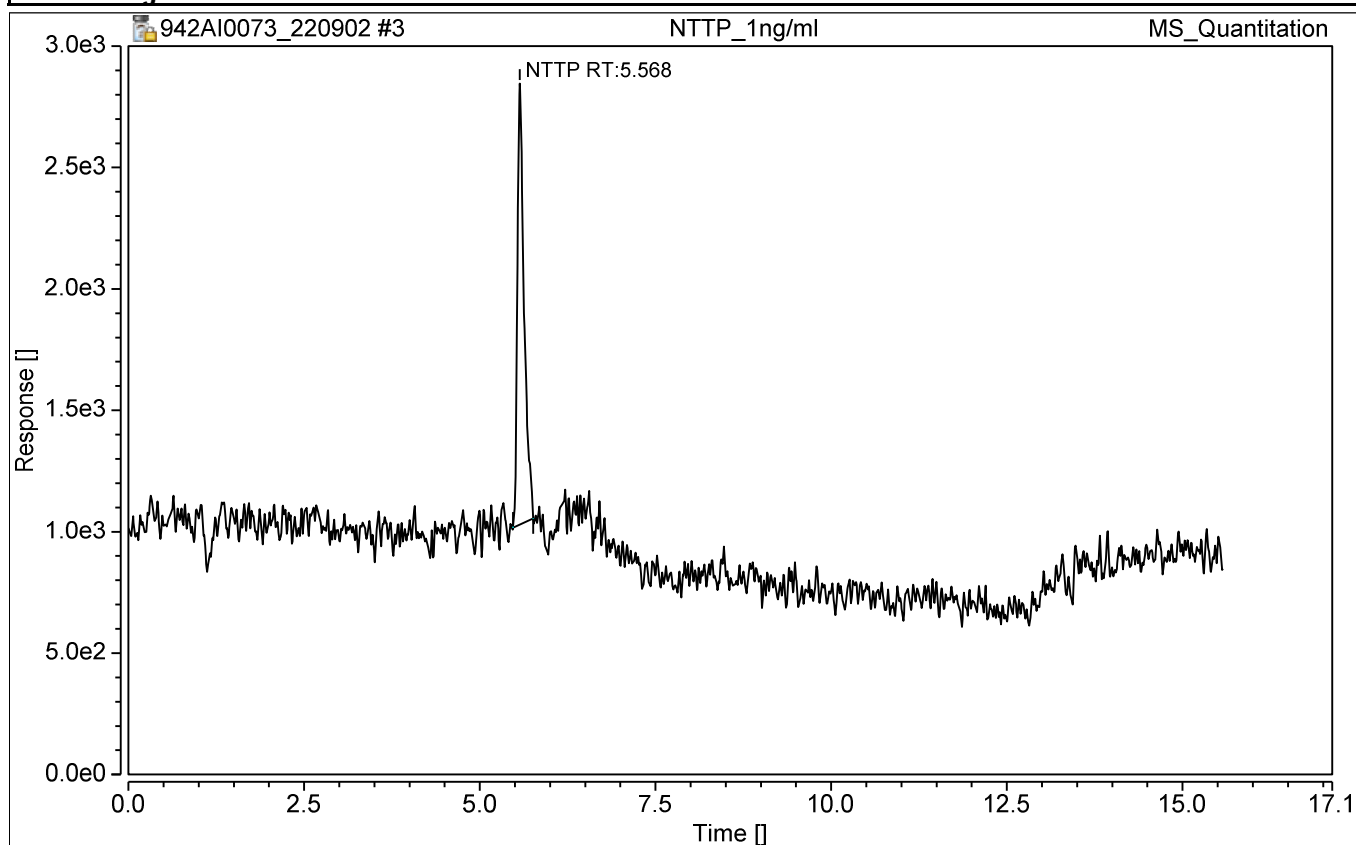

### Integration Results

| Peak Name | Retention Time min | Quantitation Ion | Area counts*s | Height counts | Amount |
|-----------|--------------------|------------------|---------------|---------------|--------|
| NTTP      | 5.568              | 165.05           | 12128.9       | 1816.906      | n.a.   |
| NTTP-1    | n.a.               | 192.12           | n.a.          | n.a.          | n.a.   |

Figure 2. Chromatogram of NTTP (ion 165.051) in method development trial 1

## Chromatogram and Results

### Injection Details

|                      |                       |                   |          |
|----------------------|-----------------------|-------------------|----------|
| Injection Name:      | Sample_LC             | Run Time (min):   | 10.00    |
| Vial Number:         | G:A6                  | Injection Volume: | 10.00    |
| Injection Type:      | Unknown               | Channel           | UV_VIS_1 |
| Instrument Method:   | 942AI0073_220903_LC-1 | Operator          | haoyajie |
| Processing Method:   | 942AI0073_220531      |                   |          |
| Injection Date/Time: | 22/09/03 15:59:10     |                   |          |

### Chromatogram

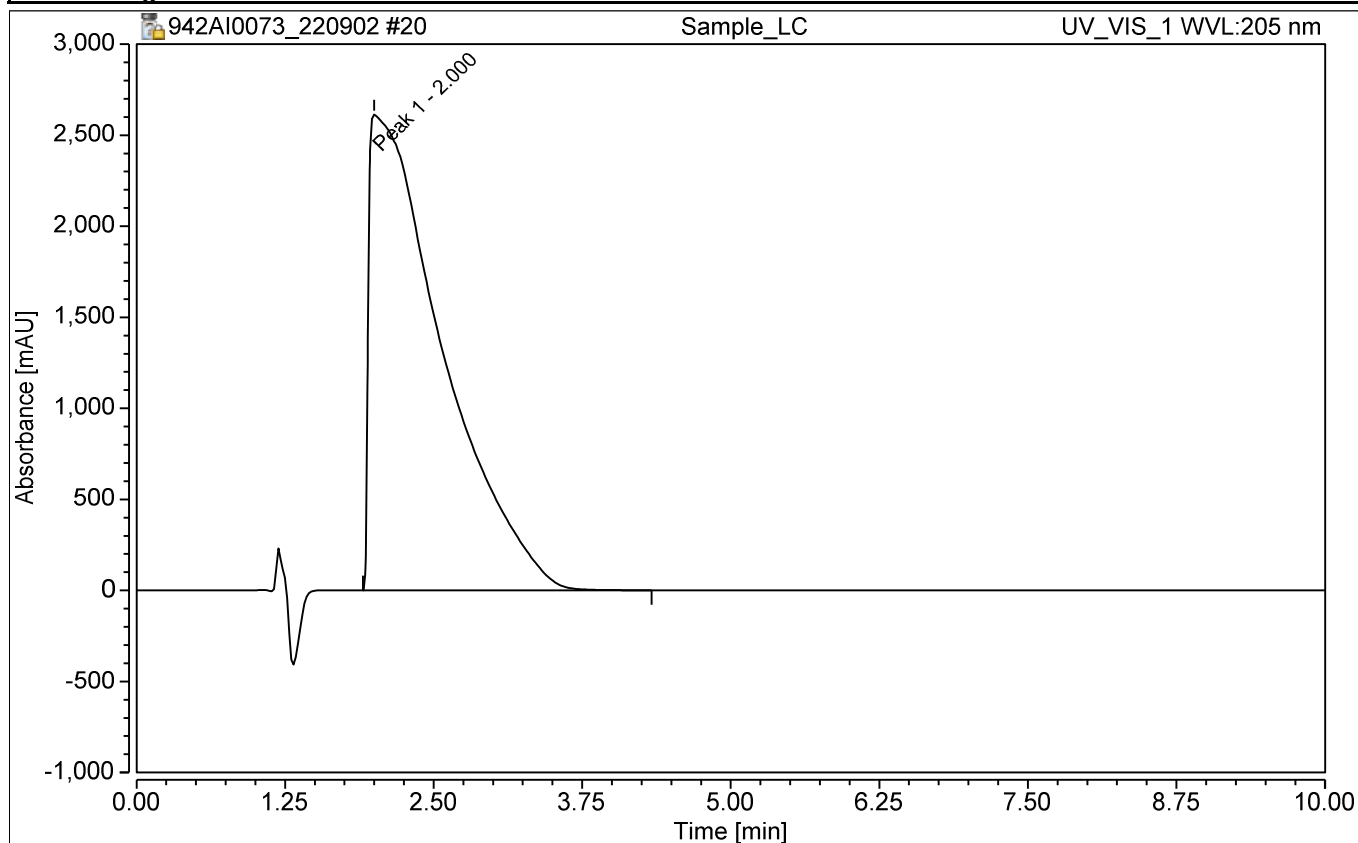

### Integration Results

| Peak Name | Retention Time min | Quantitation Ion | Area mAU*s | Height mAU | Amount |
|-----------|--------------------|------------------|------------|------------|--------|
| API       | 2.000              | n.a.             | 111519.7   | 2613.006   | n.a.   |

Figure 3. Chromatogram of Sitagliptin in method development trial 2

## Chromatogram and Results

### Injection Details

|                      |                    |                   |                 |
|----------------------|--------------------|-------------------|-----------------|
| Injection Name:      | NTTP_0.5ng/ml      | Run Time (min):   | 10.00           |
| Vial Number:         | G:A5               | Injection Volume: | 10.00           |
| Injection Type:      | Unknown            | Channel           | MS_Quantitation |
| Instrument Method:   | 942AI0073_220903-3 | Operator          | haoyajie        |
| Processing Method:   | 942AI0073_220531   |                   |                 |
| Injection Date/Time: | 22/09/03 16:09:55  |                   |                 |

### Chromatogram

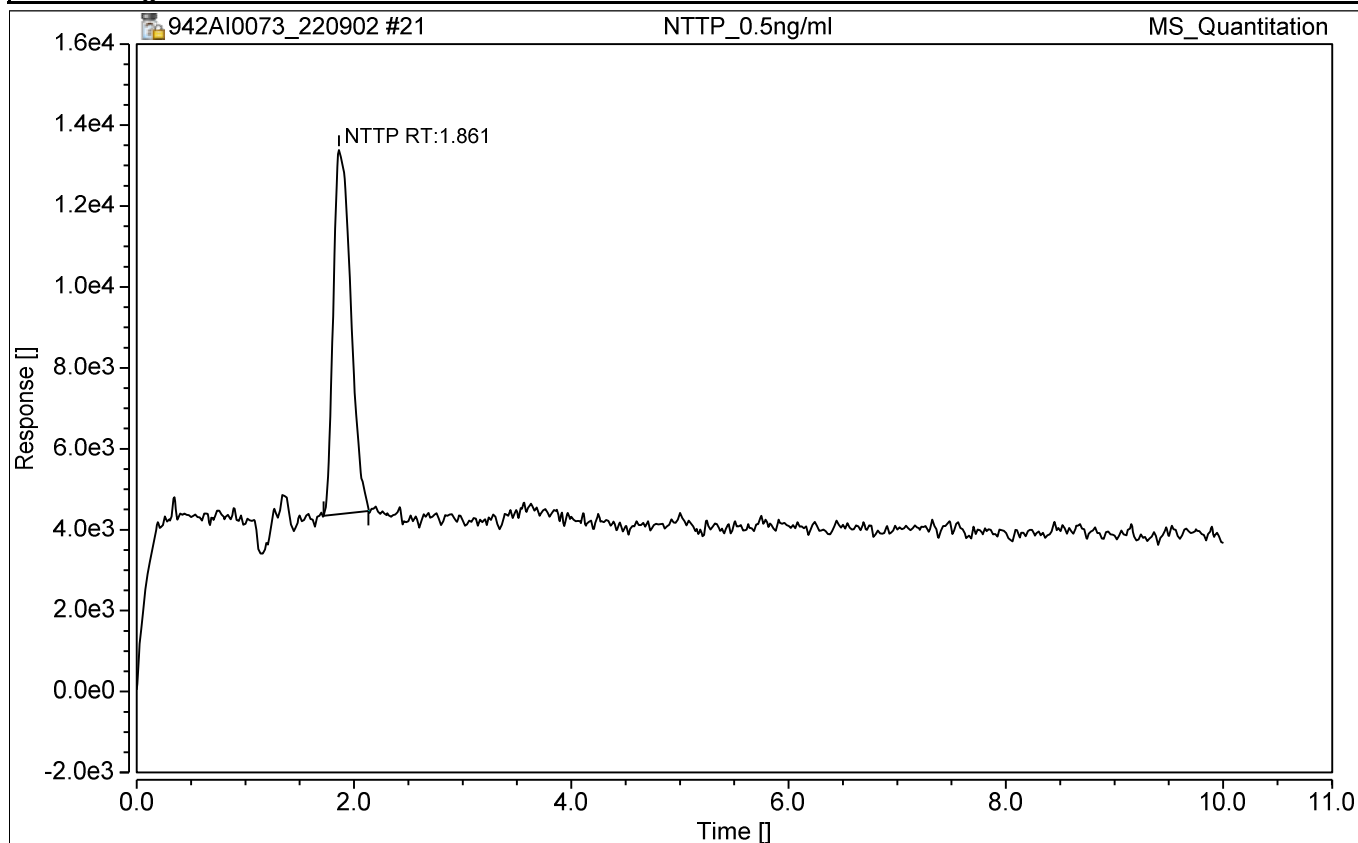

### Integration Results

| Peak Name | Retention Time min | Quantitation Ion | Area counts*s | Height counts | Amount |
|-----------|--------------------|------------------|---------------|---------------|--------|
| NTTP      | 1.861              | 192.12           | 100818.9      | 8999.748      | n.a.   |

Figure 4. Chromatogram of NTTP in method development trial 2

## Chromatogram and Results

### Injection Details

|                      |                       |                   |          |
|----------------------|-----------------------|-------------------|----------|
| Injection Name:      | Sample_LC             | Run Time (min):   | 10.00    |
| Vial Number:         | G:A6                  | Injection Volume: | 2.00     |
| Injection Type:      | Unknown               | Channel           | UV_VIS_1 |
| Instrument Method:   | 942AI0073_220903_LC-2 | Operator          | haoyajie |
| Processing Method:   | 942AI0073_220531      |                   |          |
| Injection Date/Time: | 22/09/03 16:58:57     |                   |          |

### Chromatogram

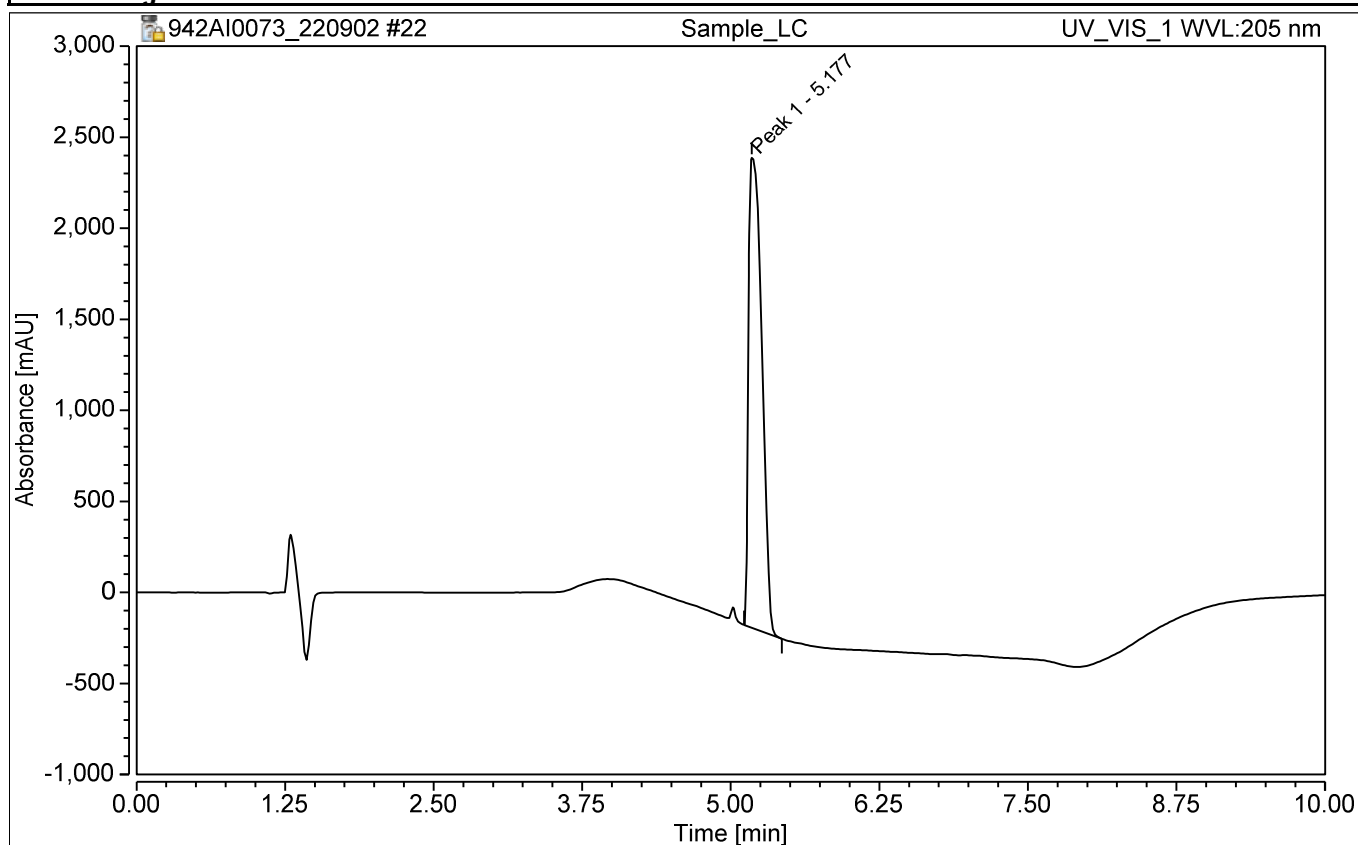

### Integration Results

| Peak Name | Retention Time min | Quantitation Ion | Area mAU*s | Height mAU | Amount |
|-----------|--------------------|------------------|------------|------------|--------|
| API       | 5.177              | n.a.             | 20091.8    | 2581.058   | n.a.   |

Figure 5. Chromatogram of Sitagliptin in method development trial 3

## Chromatogram and Results

### Injection Details

|                      |                    |                   |                 |
|----------------------|--------------------|-------------------|-----------------|
| Injection Name:      | NTTP_0.5ng/ml      | Run Time (min):   | 10.00           |
| Vial Number:         | G:A5               | Injection Volume: | 10.00           |
| Injection Type:      | Unknown            | Channel           | MS_Quantitation |
| Instrument Method:   | 942AI0073_220903-4 | Operator          | haoyajie        |
| Processing Method:   | 942AI0073_220531   |                   |                 |
| Injection Date/Time: | 22/09/03 17:17:18  |                   |                 |

### Chromatogram

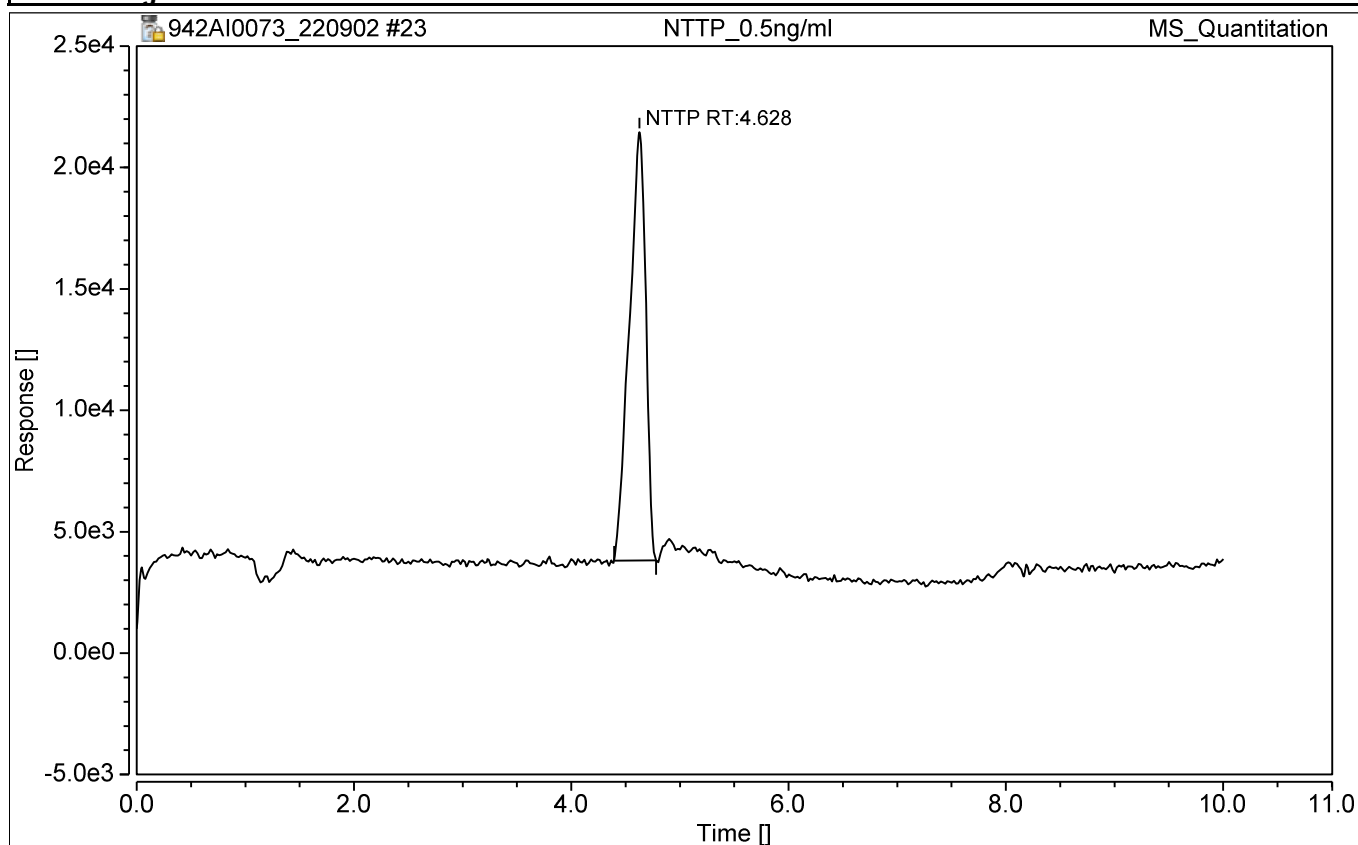

### Integration Results

| Peak Name | Retention Time min | Quantitation Ion | Area counts*s | Height counts | Amount |
|-----------|--------------------|------------------|---------------|---------------|--------|
| NTTP      | 4.628              | 192.12           | 185554.2      | 17641.512     | n.a.   |

Figure 6. Chromatogram of NTTP in method development trial 3

## Chromatogram and Results

### Injection Details

|                      |                       |                   |          |
|----------------------|-----------------------|-------------------|----------|
| Injection Name:      | Sample_LC             | Run Time (min):   | 8.00     |
| Vial Number:         | G:A6                  | Injection Volume: | 10.00    |
| Injection Type:      | Unknown               | Channel           | UV_VIS_1 |
| Instrument Method:   | 942AI0073_220903_LC-4 | Operator          | haoyajie |
| Processing Method:   | 942AI0073_220531      |                   |          |
| Injection Date/Time: | 22/09/03 21:08:29     |                   |          |

### Chromatogram

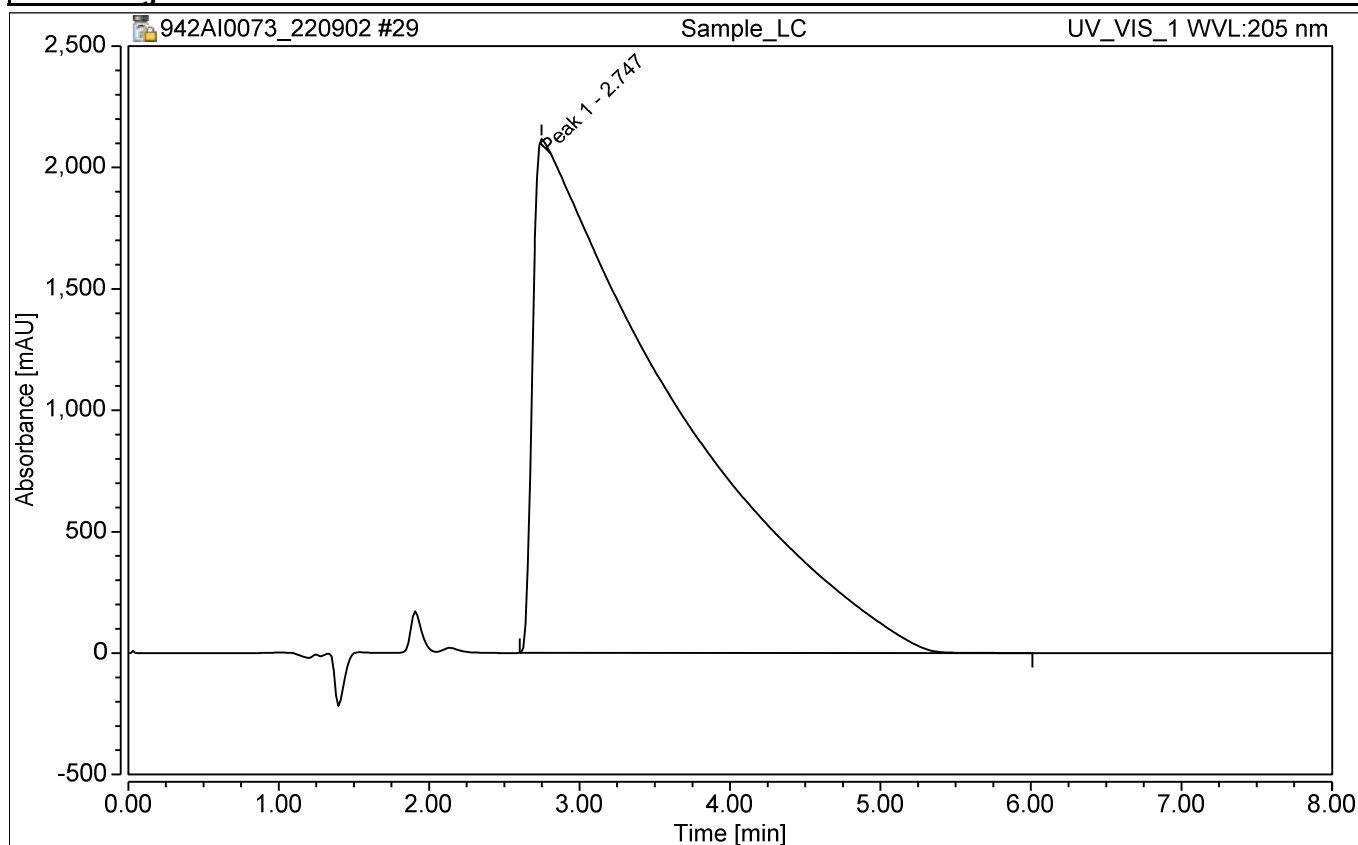

### Integration Results

| Peak Name | Retention Time min | Quantitation Ion | Area mAU*s | Height mAU | Asymmetry (EP) |
|-----------|--------------------|------------------|------------|------------|----------------|
| API       | 2.747              | n.a.             | 134144.1   | 2116.427   | 11.30          |

Figure 7. Chromatogram of Sitagliptin in method development trial 4

## Chromatogram and Results

### Injection Details

|                      |                    |                   |                 |
|----------------------|--------------------|-------------------|-----------------|
| Injection Name:      | NTTP_0.5ng/ml      | Run Time (min):   | 5.00            |
| Vial Number:         | G:A5               | Injection Volume: | 10.00           |
| Injection Type:      | Unknown            | Channel           | MS_Quantitation |
| Instrument Method:   | 942AI0073_220903-2 | Operator          | haoyajie        |
| Processing Method:   | 942AI0073_220531   |                   |                 |
| Injection Date/Time: | 22/09/03 21:39:11  |                   |                 |

### Chromatogram

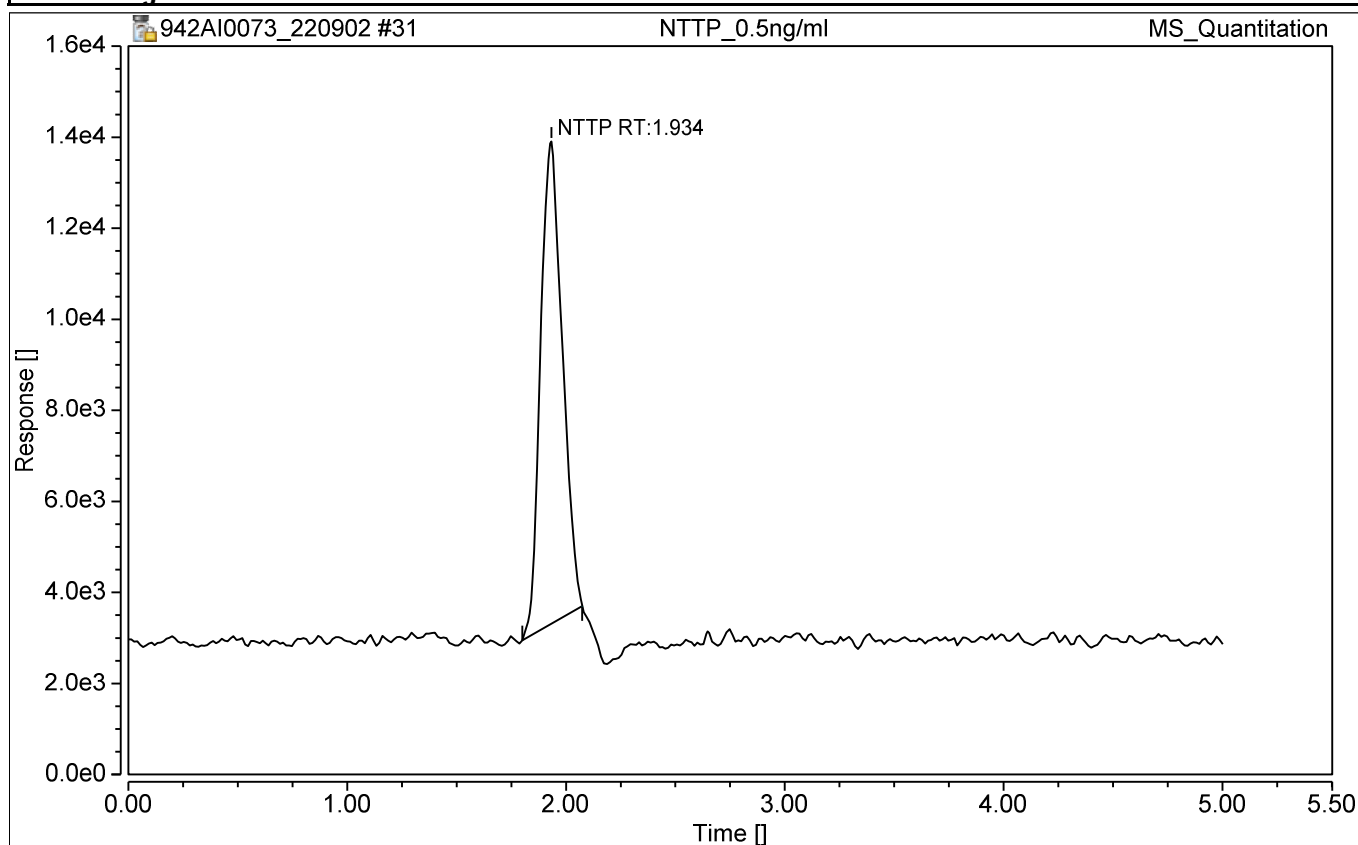

### Integration Results

| Peak Name | Retention Time min | Quantitation Ion | Area counts*s | Height counts | Asymmetry (EP) |
|-----------|--------------------|------------------|---------------|---------------|----------------|
| NTTP      | 1.934              | 192.12           | 73532.8       | 10589.922     | 1.11           |

Figure 8. Chromatogram of NTTP in method development trial 4



## Chromatogram and Results

### Injection Details

|                      |                        |                   |                 |
|----------------------|------------------------|-------------------|-----------------|
| Injection Name:      | NTTP_0.5ng/ml          | Run Time (min):   | 10.00           |
| Vial Number:         | G:A5                   | Injection Volume: | 10.00           |
| Injection Type:      | Unknown                | Channel           | MS_Quantitation |
| Instrument Method:   | 942AI0073_220904-2     | Operator          | haoyajie        |
| Processing Method:   | 942AI0073_Quantitative |                   |                 |
| Injection Date/Time: | 22/09/04 12:54:40      |                   |                 |

### Chromatogram

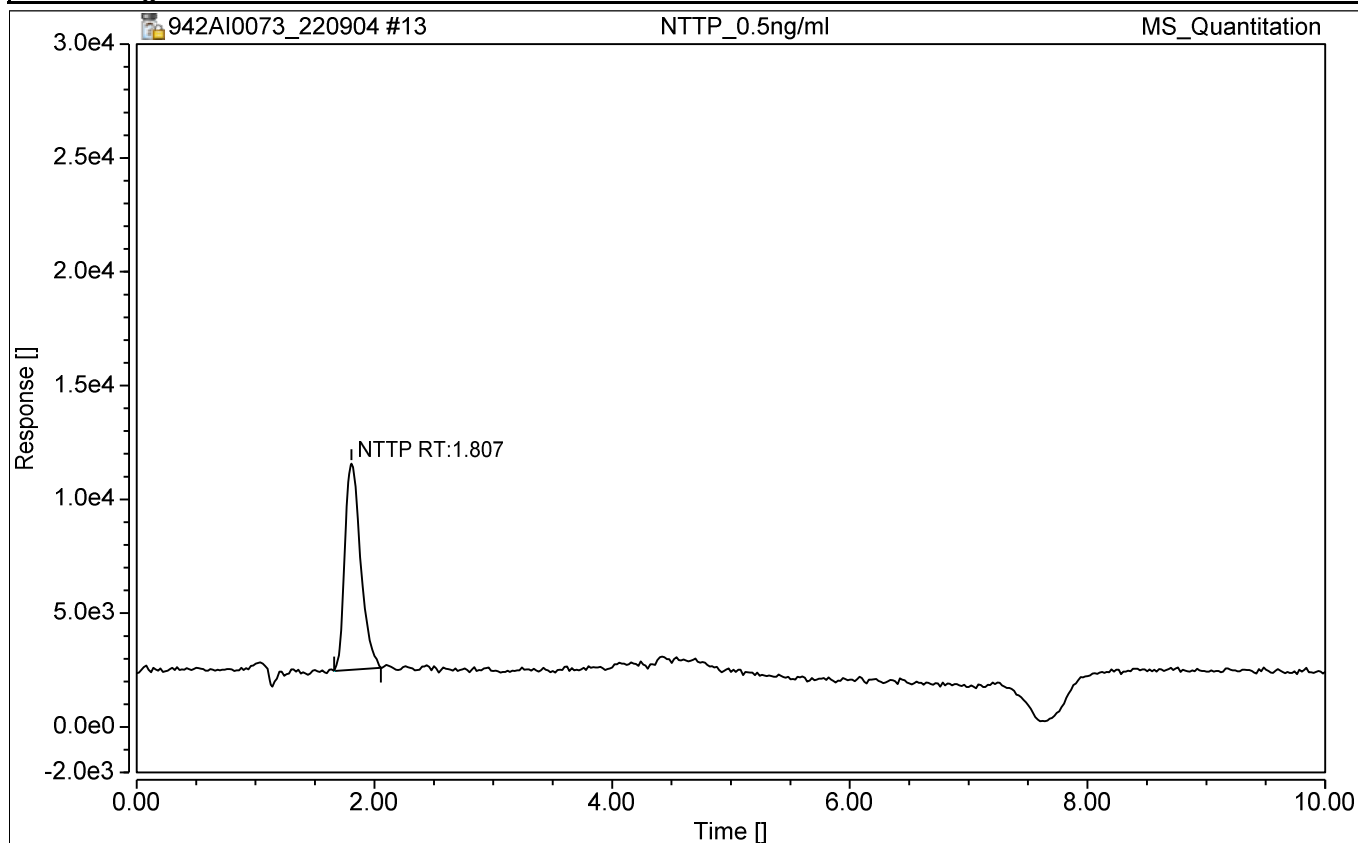

### Integration Results

| Peak Name | Retention Time min | Quantitation Ion | Area counts*s | Height counts | Asymmetry (EP) |
|-----------|--------------------|------------------|---------------|---------------|----------------|
| NTTP      | 1.807              | 192.12           | 84153.9       | 9060.289      | 1.42           |

Figure 9. Chromatogram of Sitagliptin in method development trial 5

## Chromatogram and Results

### Injection Details

|                      |                        |                   |          |
|----------------------|------------------------|-------------------|----------|
| Injection Name:      | Sample_LC              | Run Time (min):   | 10.00    |
| Vial Number:         | G:A6                   | Injection Volume: | 10.00    |
| Injection Type:      | Unknown                | Channel           | UV_VIS_1 |
| Instrument Method:   | 942AI0073_220904_LC-2  | Operator          | haoyajie |
| Processing Method:   | 942AI0073_Quantitative |                   |          |
| Injection Date/Time: | 22/09/04 11:47:12      |                   |          |

### Chromatogram

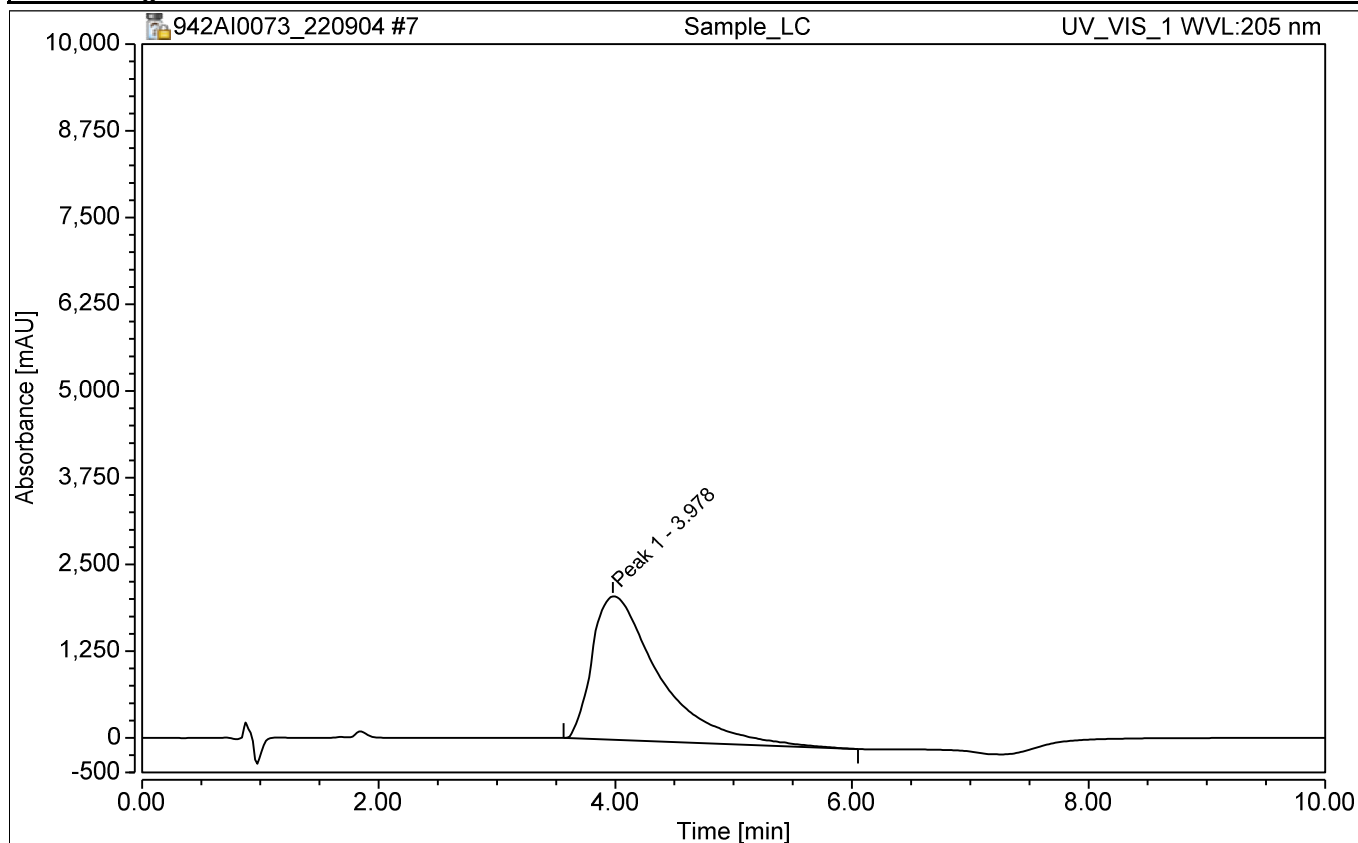

### Integration Results

| Peak Name | Retention Time min | Quantitation Ion | Area mAU*s | Height mAU | Asymmetry (EP) |
|-----------|--------------------|------------------|------------|------------|----------------|
| NTTP      | n.a.               | n.a.             | n.a.       | n.a.       | n.a.           |

Figure 10. Chromatogram of NTTP in method development trial 5

## Chromatogram and Results

| Injection Details    |                        |                   |                 |
|----------------------|------------------------|-------------------|-----------------|
| Injection Name:      | Diluent                | Run Time (min):   | 10.00           |
| Vial Number:         | R:A1                   | Injection Volume: | 15.00           |
| Injection Type:      | Unknown                | Channel           | MS_Quantitation |
| Instrument Method:   | 942AI0073_220922       | Operator          | haoyajieGMP     |
| Processing Method:   | 942AI0073_Quantitative |                   |                 |
| Injection Date/Time: | 22/09/22 12:25:08      |                   |                 |

### Chromatogram

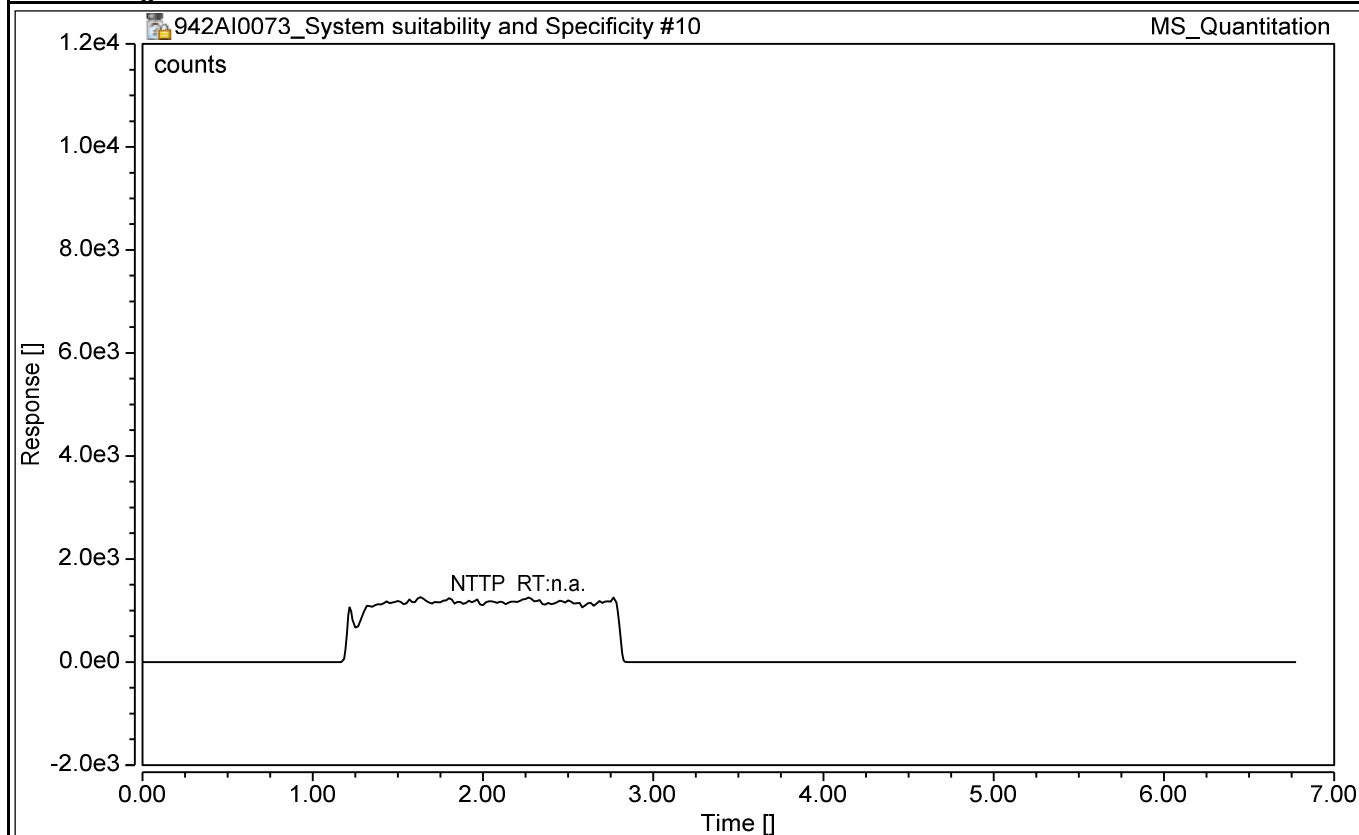

| Integration Results |                       |                     |              |                |                |
|---------------------|-----------------------|---------------------|--------------|----------------|----------------|
| Peak Name           | Retention Time<br>min | Quantitation<br>Ion | Area<br>n.a. | Height<br>n.a. | Amount<br>n.a. |

Figure 11 Typical chromatogram of blank solution in validation

## Chromatogram and Results

| Injection Details    |                        |                   |                 |
|----------------------|------------------------|-------------------|-----------------|
| Injection Name:      | Sample                 | Run Time (min):   | 10.00           |
| Vial Number:         | R:A3                   | Injection Volume: | 15.00           |
| Injection Type:      | Unknown                | Channel           | MS_Quantitation |
| Instrument Method:   | 942AI0073_220922       | Operator          | haoyajieGMP     |
| Processing Method:   | 942AI0073_Quantitative |                   |                 |
| Injection Date/Time: | 22/09/22 12:35:55      |                   |                 |

### Chromatogram

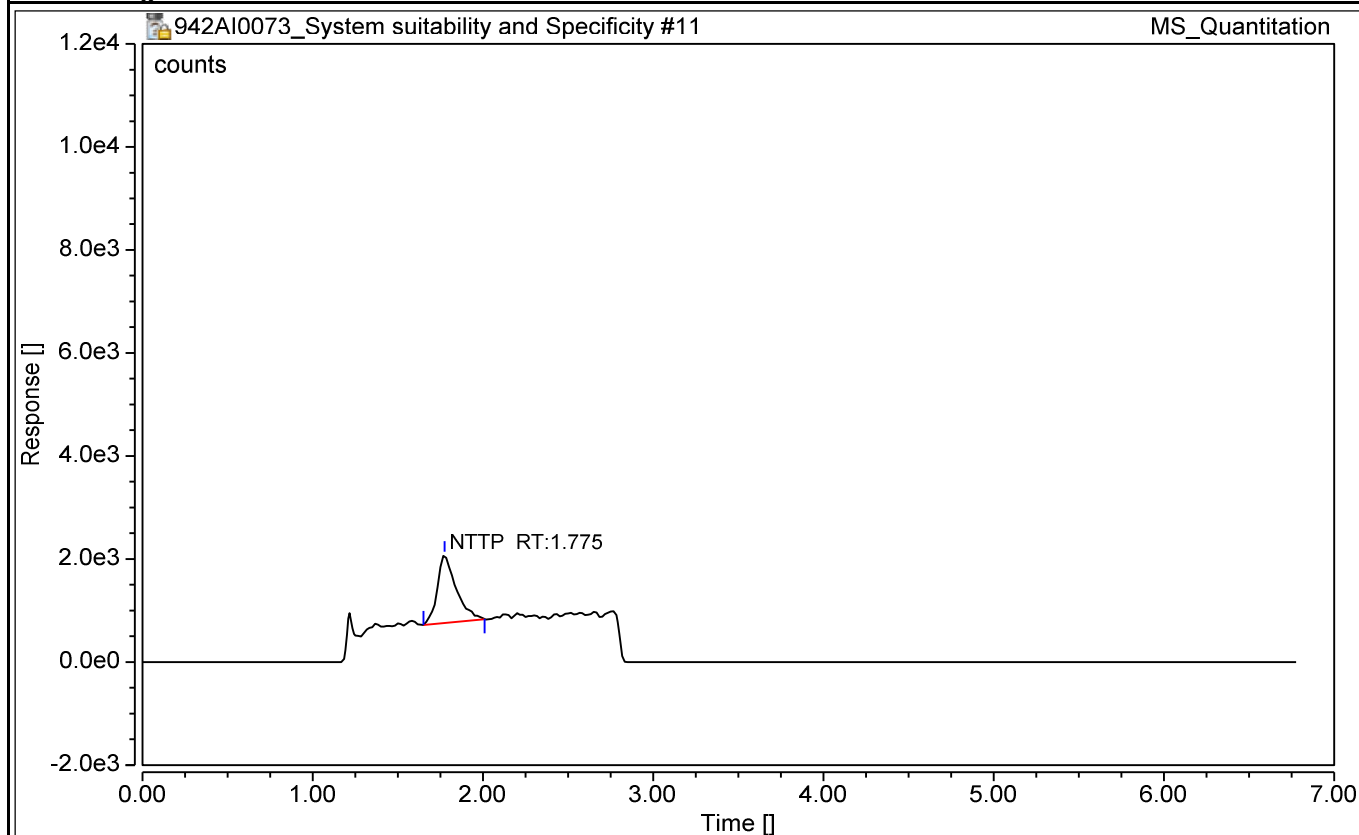

| Integration Results |                       |                     |                  |                  |        |
|---------------------|-----------------------|---------------------|------------------|------------------|--------|
| Peak Name           | Retention Time<br>min | Quantitation<br>Ion | Area<br>counts*s | Height<br>counts | Amount |
| NTPP                | 1.775                 | 192.13              | 10170.2          | 1313             | n.a.   |

Figure 12 Typical chromatogram of sample solution in validation

## Chromatogram and Results

| Injection Details    |                        |                   |                 |
|----------------------|------------------------|-------------------|-----------------|
| Injection Name:      | NTPP                   | Run Time (min):   | 10.00           |
| Vial Number:         | R:A2                   | Injection Volume: | 15.00           |
| Injection Type:      | Unknown                | Channel           | MS_Quantitation |
| Instrument Method:   | 942AI0073_220922       | Operator          | haoyajieGMP     |
| Processing Method:   | 942AI0073_Quantitative |                   |                 |
| Injection Date/Time: | 22/09/22 12:46:41      |                   |                 |

### Chromatogram

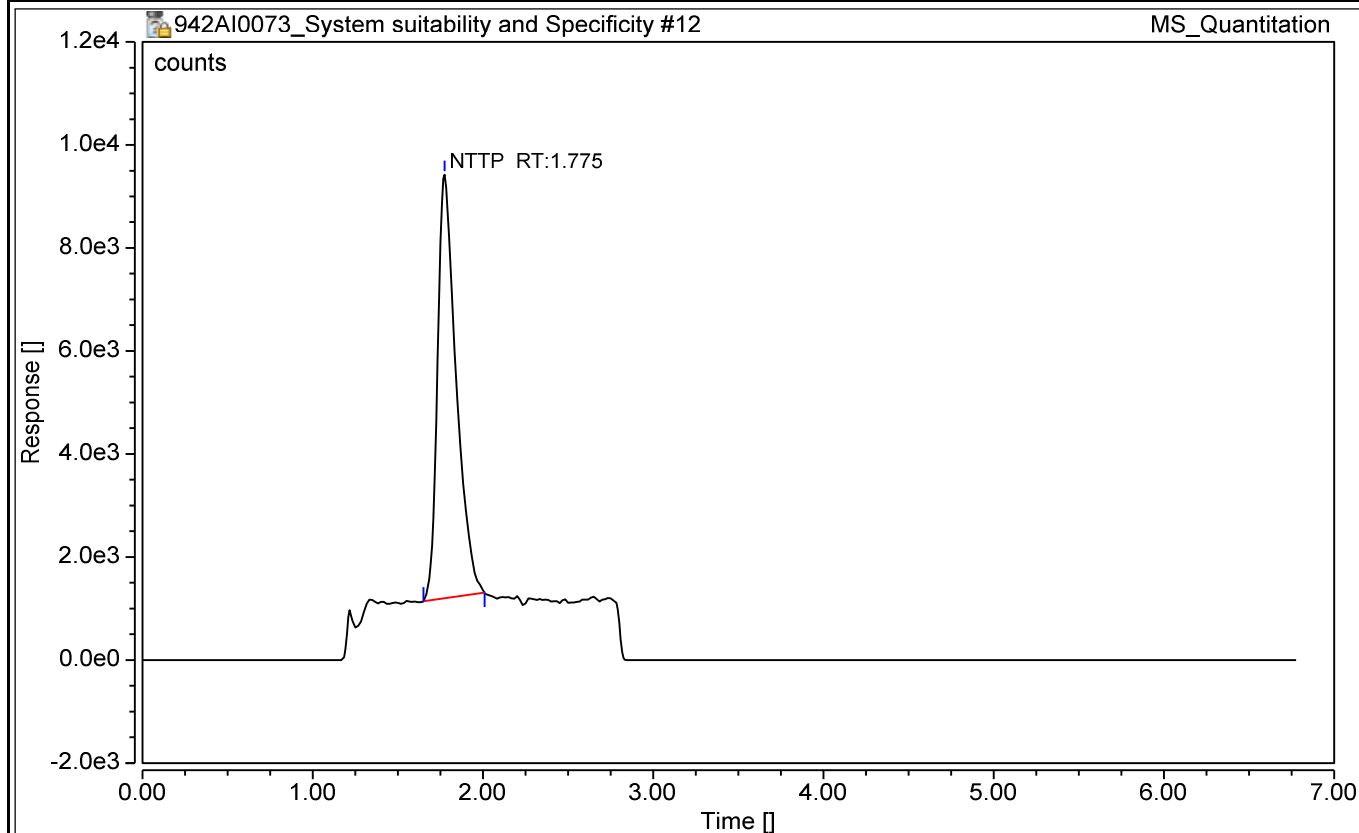

| Integration Results |                       |                     |                  |                  |        |
|---------------------|-----------------------|---------------------|------------------|------------------|--------|
| Peak Name           | Retention Time<br>min | Quantitation<br>Ion | Area<br>counts*s | Height<br>counts | Amount |
| NTPP                | 1.775                 | 192.13              | 62525.0          | 8218             | n.a.   |

Figure 13 Typical chromatogram of standard solution in validation

## Chromatogram and Results

| Injection Details    |                        |                   |                 |
|----------------------|------------------------|-------------------|-----------------|
| Injection Name:      | Spiked sample          | Run Time (min):   | 10.00           |
| Vial Number:         | R:A4                   | Injection Volume: | 15.00           |
| Injection Type:      | Unknown                | Channel           | MS_Quantitation |
| Instrument Method:   | 942AI0073_220922       | Operator          | haoyajieGMP     |
| Processing Method:   | 942AI0073_Quantitative |                   |                 |
| Injection Date/Time: | 22/09/22 12:57:28      |                   |                 |

### Chromatogram

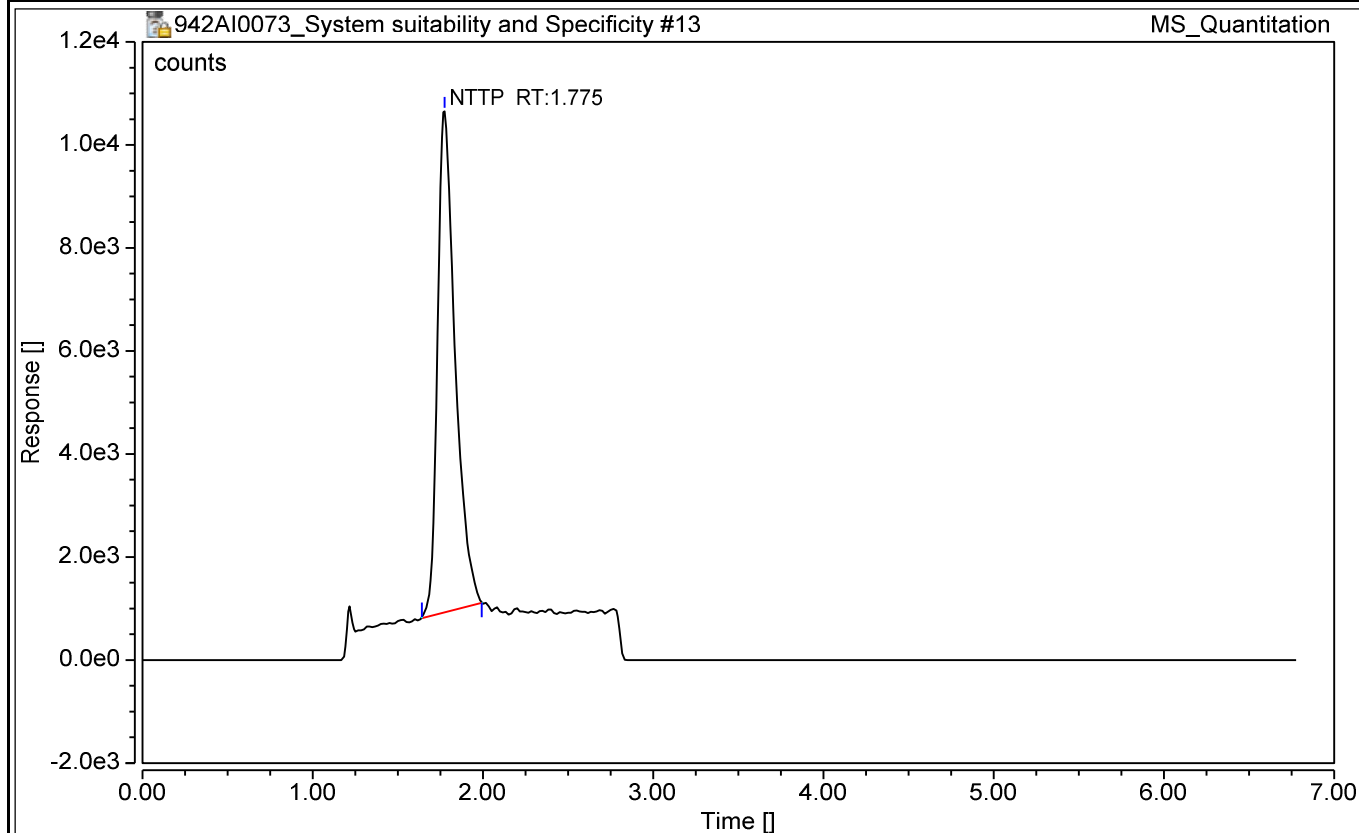

| Integration Results |                       |                     |                  |                  |        |
|---------------------|-----------------------|---------------------|------------------|------------------|--------|
| Peak Name           | Retention Time<br>min | Quantitation<br>Ion | Area<br>counts*s | Height<br>counts | Amount |
| NTTP                | 1.775                 | 192.13              | 70352.8          | 9726             | n.a.   |

Figure 14 Typical chromatogram of spiked sample solution in validation

## Chromatogram and Results

### Injection Details

|                      |                        |                   |                 |
|----------------------|------------------------|-------------------|-----------------|
| Injection Name:      | LOQ_1                  | Run Time (min):   | 10.00           |
| Vial Number:         | R:A5                   | Injection Volume: | 15.00           |
| Injection Type:      | Unknown                | Channel           | MS_Quantitation |
| Instrument Method:   | 942AI0073_220922       | Operator          | haoyajieGMP     |
| Processing Method:   | 942AI0073_Quantitative |                   |                 |
| Injection Date/Time: | 22/09/22 13:19:11      |                   |                 |

### Chromatogram

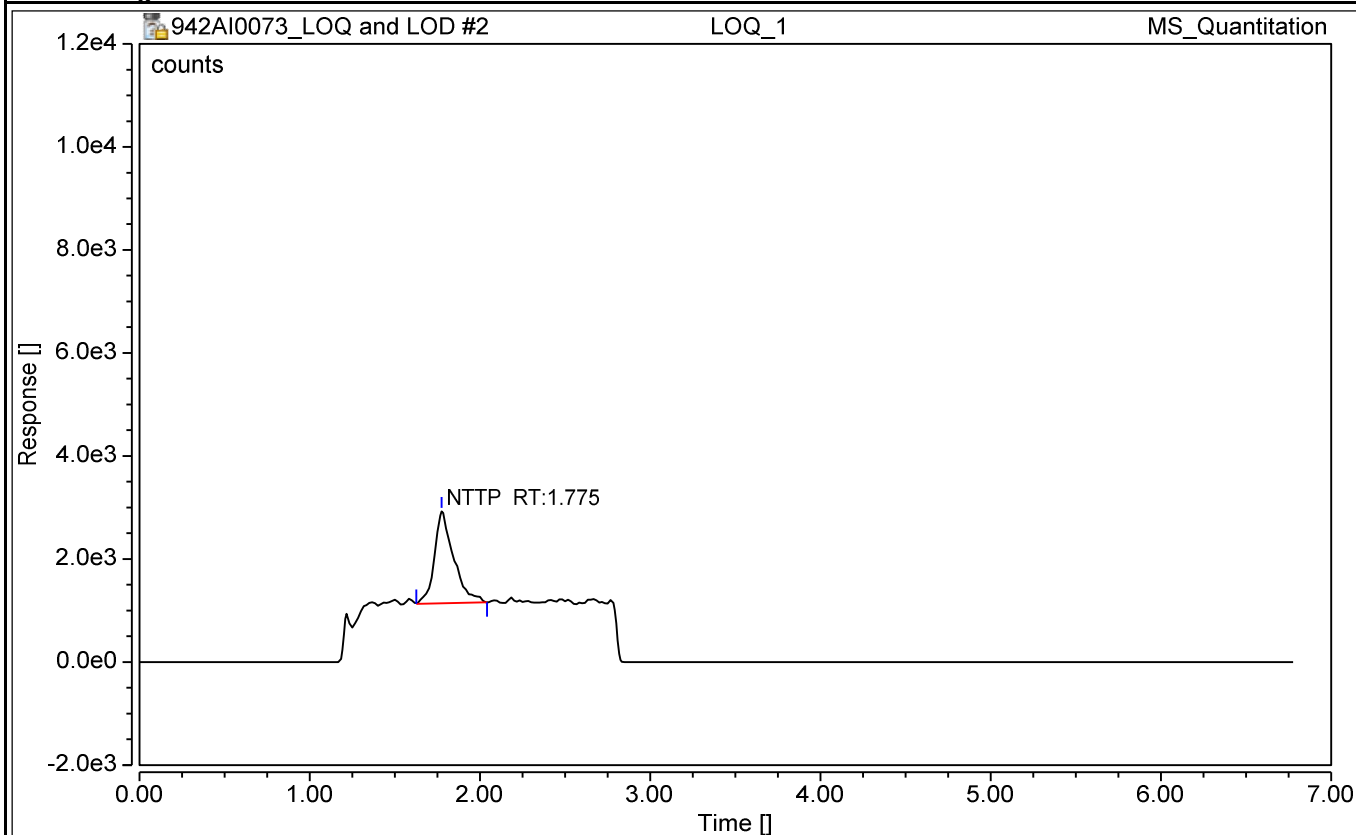

### Integration Results

| Peak Name | Retention Time<br>min | Quantitation<br>Ion | Area<br>counts*s | Height<br>counts | S/N  |
|-----------|-----------------------|---------------------|------------------|------------------|------|
| NTTP      | 1.775                 | 192.13              | 13978.4          | 1784             | 24.8 |

Figure 15 Typical chromatogram of LOQ in validation

## Chromatogram and Results

| Injection Details    |                        |                   |                 |
|----------------------|------------------------|-------------------|-----------------|
| Injection Name:      | LOD_2                  | Run Time (min):   | 10.00           |
| Vial Number:         | R:A6                   | Injection Volume: | 15.00           |
| Injection Type:      | Unknown                | Channel           | MS_Quantitation |
| Instrument Method:   | 942AI0073_220922       | Operator          | haoyajieGMP     |
| Processing Method:   | 942AI0073_Quantitative |                   |                 |
| Injection Date/Time: | 22/09/22 14:34:38      |                   |                 |

### Chromatogram

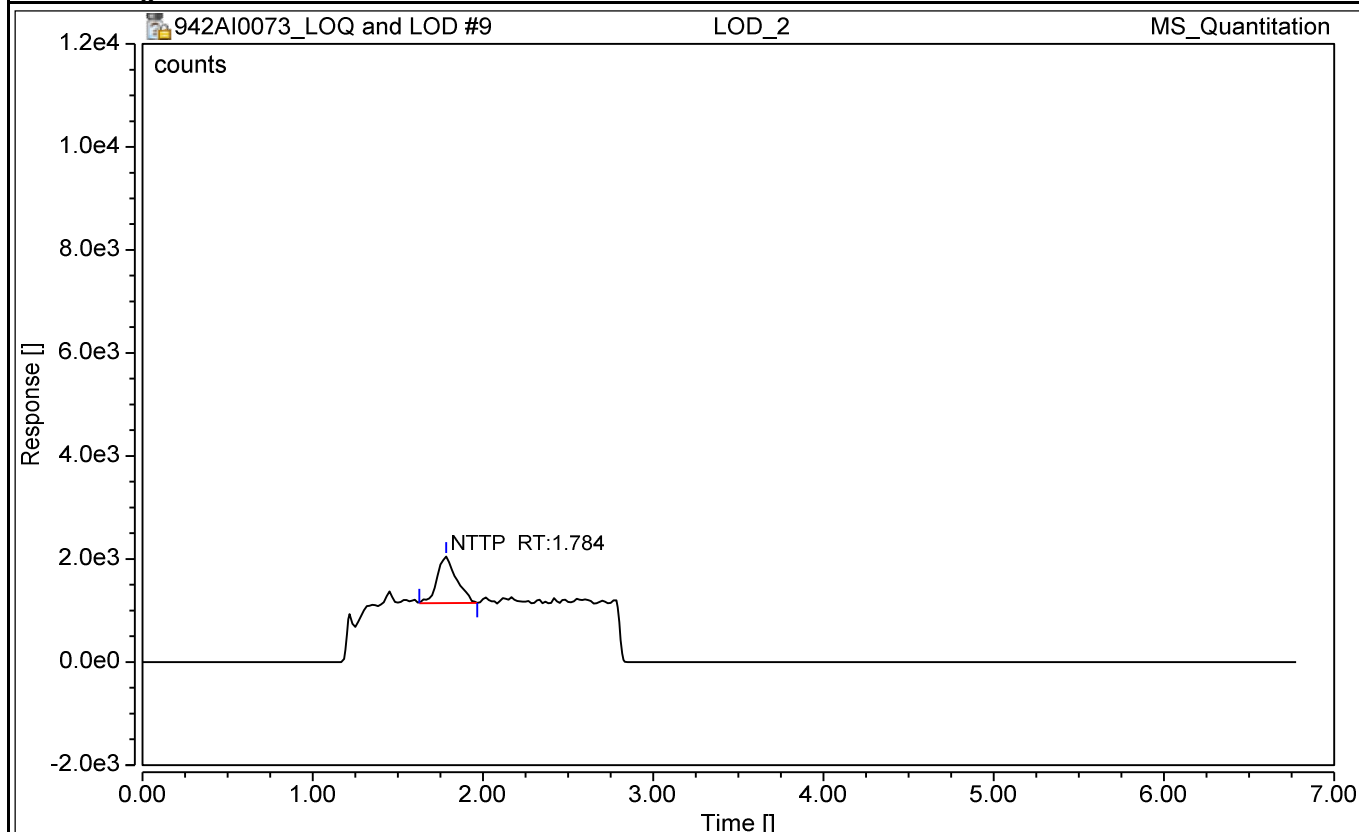

| Integration Results |                       |                     |                  |                  |      |
|---------------------|-----------------------|---------------------|------------------|------------------|------|
| Peak Name           | Retention Time<br>min | Quantitation<br>Ion | Area<br>counts*s | Height<br>counts | S/N  |
| NTTP                | 1.784                 | 192.13              | 7151.1           | 902              | 13.8 |

Figure 16 Typical chromatogram of LOD in validation
